# Supplementary material for: The influence of body size and net diversification rate on molecular evolution during the radiation of animal phyla
Source: PubMed Central journal article supplement (PMC1929056; doi:10.1186/1471-2148-7-95), 2007-06-26
Supplement: 1471-2148-7-95-S1.pdf [file 1471-2148-7-95-S1.pdf]

|                 |                    |                 |                    |
|-----------------|--------------------|-----------------|--------------------|
| Acoela          | <b>Order</b>       | Orthonectida    | <b>Phylum</b>      |
| Turbellaria     | <b>Class</b>       | Trematoda       | <b>Class</b>       |
| Cestoda         | <b>Class</b>       | Monogenea       | <b>Class</b>       |
| Urochordata     | <b>Sub-phylum</b>  | Cephalochordata | <b>Sub-phylum</b>  |
| Chondrichthyes  | <b>Class</b>       | Petromyzontidae | <b>Family</b>      |
| Serpentes       | <b>Infra-order</b> | Lepidosauria    | <b>Super-order</b> |
| Echinoidea      | <b>Class</b>       | Holothuroidea   | <b>Class</b>       |
| Asteroidea      | <b>Class</b>       | Ophiuroidea     | <b>Class</b>       |
| Enteropneusta   | <b>Class</b>       | Pterobranchia   | <b>Class</b>       |
| Priapulida      | <b>Phylum</b>      | Kinorhyncha     | <b>Phylum</b>      |
| Nematomorpha    | <b>Phylum</b>      | Nematoda        | <b>Phylum</b>      |
| Onychophora     | <b>Phylum</b>      | Tardigrada      | <b>Phylum</b>      |
| Araneae         | <b>Order</b>       | Acari           | <b>Sub-class</b>   |
| Orthoptera      | <b>Order</b>       | Hemiptera       | <b>Order</b>       |
| Hymenoptera     | <b>Order</b>       | Coleoptera      | <b>Order</b>       |
| Lepidoptera     | <b>Order</b>       | Diptera         | <b>Order</b>       |
| Copepoda        | <b>Sub-class</b>   | Ostracoda       | <b>Class</b>       |
| Eucarida        | <b>Super-order</b> | Peracarida      | <b>Super-order</b> |
| Brachiopoda     | <b>Phylum</b>      | Phoroniformea   | <b>Sub-phylum</b>  |
| Acanthocephala  | <b>Phylum</b>      | Rotifera        | <b>Phylum</b>      |
| Aplacophora     | <b>Class</b>       | Caudofoveata    | <b>Sub-class</b>   |
| Bivalvia        | <b>Class</b>       | Polyplacophora  | <b>Class</b>       |
| Cephalopoda     | <b>Class</b>       | Scaphopoda      | <b>Class</b>       |
| Opisthobranchia | <b>Order</b>       | Pulmonata       | <b>Order</b>       |
| Polychaeta      | <b>Class</b>       | Oligochaeta     | <b>Sub-class</b>   |
