# Supplementary material for: The influence of body size and net diversification rate on molecular evolution during the radiation of animal phyla
Source: PubMed Central journal article supplement (PMC1929056; doi:10.1186/1471-2148-7-95), 2007-06-26
Supplement: 1471-2148-7-95-S3.pdf [file 1471-2148-7-95-S3.pdf]

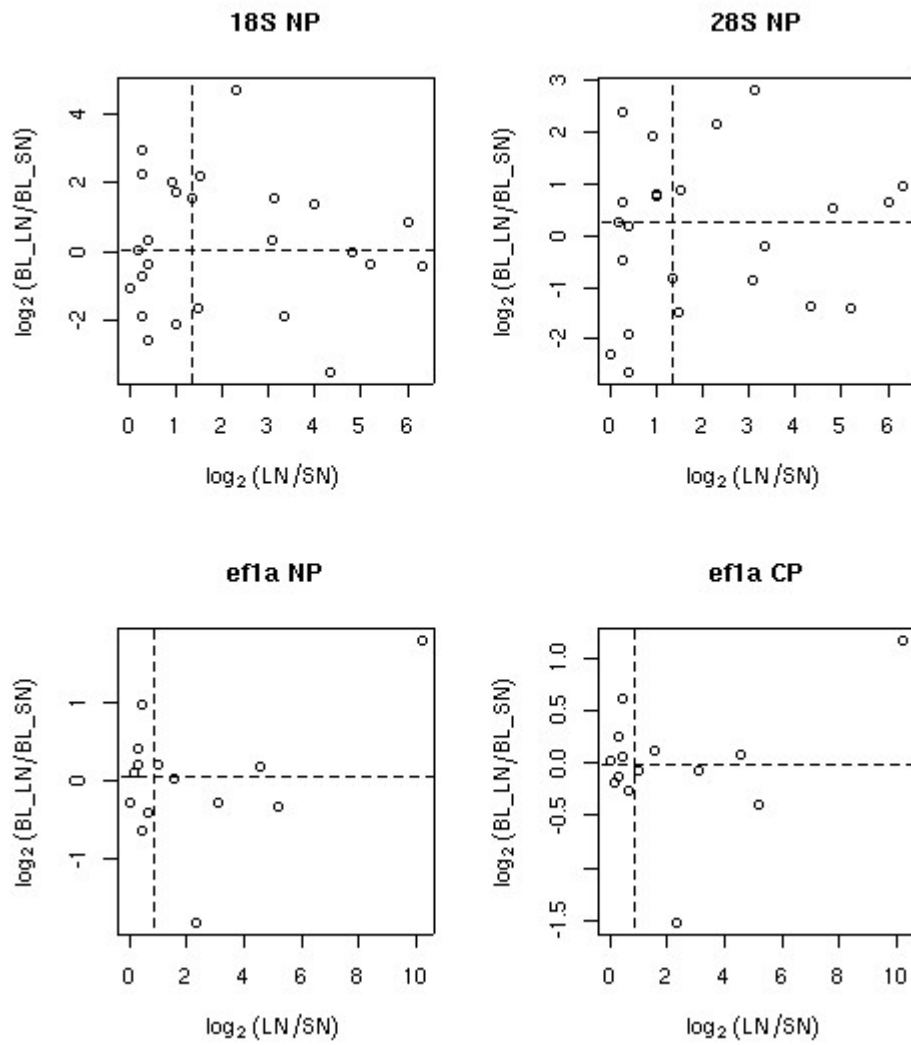

**(a) Nuclear genes**

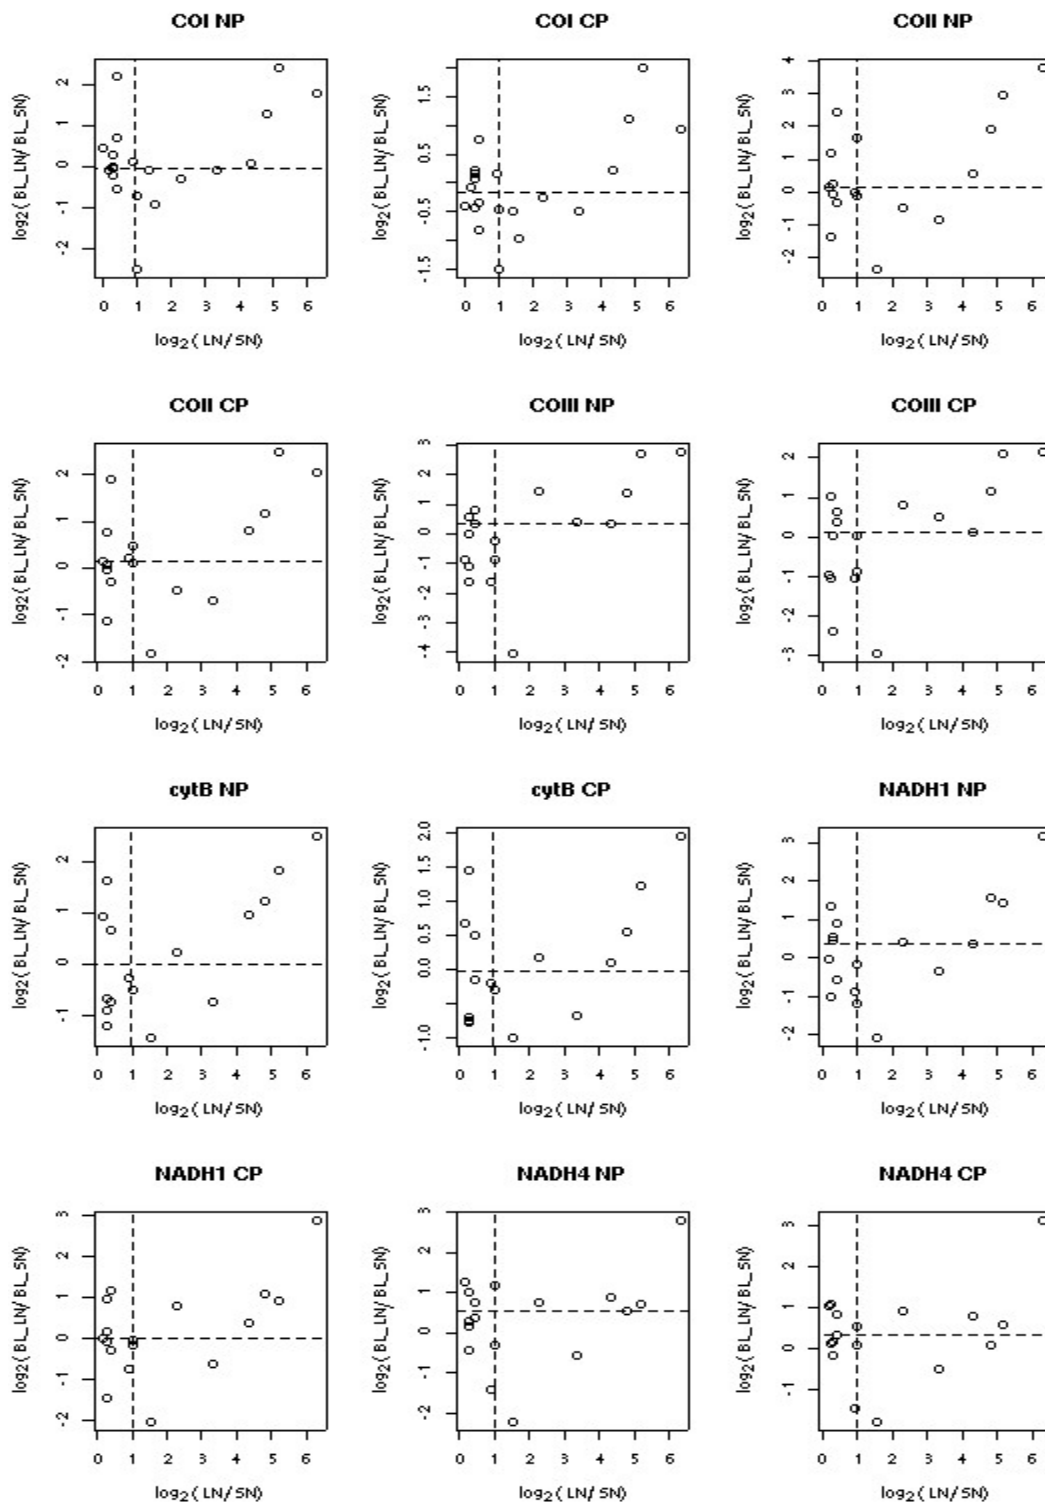

**(b) Mitochondrial genes**

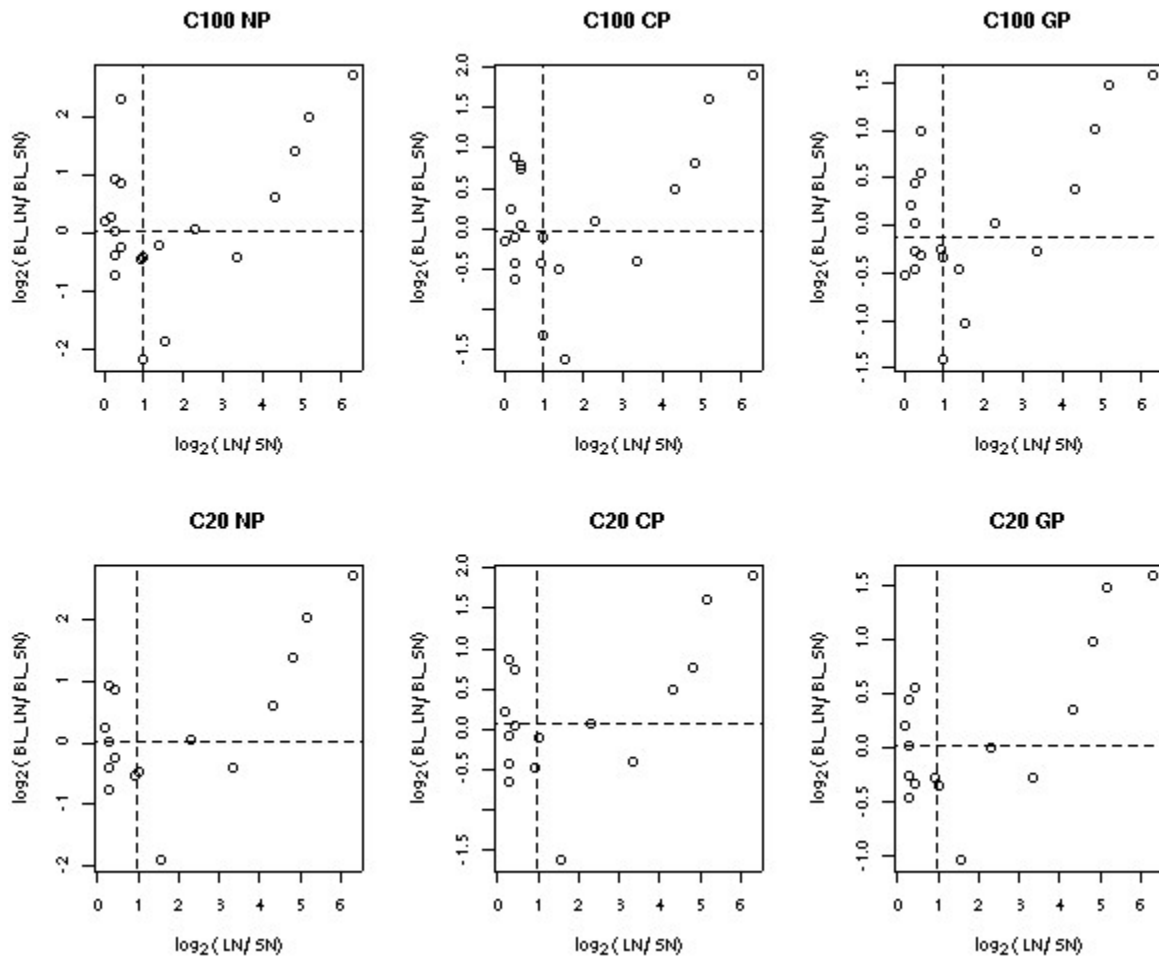

(c) Concatenation of the mitochondrial genes
