# Supplementary material for: The influence of body size and net diversification rate on molecular evolution during the radiation of animal phyla
Source: PubMed Central journal article supplement (PMC1929056; doi:10.1186/1471-2148-7-95), 2007-06-26
Supplement: 1471-2148-7-95-S4.pdf [file 1471-2148-7-95-S4.pdf]

|                              |                        | <b>Min</b> | <b>Max</b> | <b>Geometric Mean</b> |
|------------------------------|------------------------|------------|------------|-----------------------|
| <b>Thomas et al.<br/>(1)</b> | <b>Lepidoptera</b>     | 1.00       | 2.70       | 1.26                  |
|                              | <b>Arachnida</b>       | 1.17       | 5.05       | 1.74                  |
|                              | <b>Cephalopoda</b>     | 1.10       | 150.00     | 2.89                  |
|                              | <b>Gastropoda</b>      | 1.31       | 25.05      | 3.78                  |
|                              | <b>Echinodermata</b>   | 1.10       | 7.00       | 2.06                  |
|                              | <b>Platyhelminthes</b> | 1.03       | 5000.00    | 7.71                  |
|                              | <b>Hymenoptera</b>     | 1.10       | 17.71      | 3.27                  |
|                              | <b>Annelida</b>        | 1.02       | 8.38       | 3.20                  |
|                              | <b>Bivalvia</b>        | 1.26       | 49.79      | 5.44                  |
|                              | <b>Monogenea</b>       | 1.18       | 9.11       | 2.09                  |
| <b>Present study</b>         | <b>Metazoa</b>         | 1.13       | 5775454.55 | 124.67                |
