# Supplementary material for: The influence of body size and net diversification rate on molecular evolution during the radiation of animal phyla
Source: PubMed Central journal article supplement (PMC1929056; doi:10.1186/1471-2148-7-95), 2007-06-26
Supplement: 1471-2148-7-95-S7.pdf [file 1471-2148-7-95-S7.pdf]

Quick access to the tables:

[18S](#), [28S](#), [ef1a](#), [COI](#), [COII](#), [COIII](#), [cytB](#), [NADH1](#), [NADH4](#)

## (a) : 18S

| Pairs (Taxon 1/Taxon 2)          | Taxon 1                               |          | Taxon 2                             |          |
|----------------------------------|---------------------------------------|----------|-------------------------------------|----------|
|                                  | Species name                          | Acc. No. | Species name                        | Acc. No. |
| 1 Acoela/Orthonectida            | <i>Symsagittifera corsicae</i>        | AJ319029 | <i>Rhopalura ophiocomae</i>         | X97158   |
| 2 Turbellaria/Trematoda          | <i>Archimonocelis crucifera</i>       | AJ270151 | <i>Xystretum sp.</i>                | AJ287588 |
| 3 Cestoda/Monogenea              | <i>Skryabinia cesticillus</i>         | AY382316 | <i>Haliotrema scyphovagina</i>      | AY820611 |
| 4 Urochordata/Cephalochordata    | <i>Megalodicopia hians</i>            | AB075543 | <i>Branchios toma floridae</i>      | M97571   |
| 5 Chondrichthyes/Petromyzontidae | <i>Urobatis jamaicensis</i>           | AY049861 | <i>Petromyzon marinus</i>           | M97575   |
| 6 Serpentes/Lepidosauria         | <i>Heterodon platirhinos</i>          | M59392   | <i>Sceloporus undulatus</i>         | M59400   |
| 7 Echinoidea/Holothuroidea       | <i>Temnopleurus hardwickii</i>        | Z37135   | <i>Afrocucumis africana</i>         | AY133483 |
| 8 Asteroidea/Ophiuroidea         | <i>Asterina coronata</i>              | AB084566 | <i>Ophiocanops fugiens</i>          | Z80954   |
| 9 Enteropneusta/Pterobranchia    | <i>Hamimania planktophilus</i>        | AF236799 | <i>Cephalodiscus gracilis</i>       | AF236798 |
| 10 Priapulida/Kinorhyncha        | <i>Tubiluchus corallicola</i>         | AF119086 | <i>Pycnophyes kielensis</i>         | U67997   |
| 11 Nematomorpha/Nematoda         | <i>Gordius sp.</i>                    | U51005   | <i>Silbonema majum</i>              | Y16922   |
| 12 Onychophora/Tardigrada        | <i>Euperipatoides leuckartii</i>      | U49910   | <i>Hypsibius sp.</i>                | Z93337   |
| 13 Araneae/Acari                 | <i>Nesticus cellulanus</i>            | AF005447 | <i>Opilioacarus texanus</i>         | AF115375 |
| 14 Orthoptera/Hemiptera          | <i>Oxya chinensis</i>                 | AY037173 | <i>Hemertaris oshanini</i>          | AY324853 |
| 15 Hymenoptera/Coleoptera        | <i>Aphelinus gossypii</i>             | AY216700 | <i>Clambus ametti</i>               | AF012526 |
| 16 Lepidoptera/Diptera           | <i>Attacus ricini</i>                 | AF535029 | <i>Anopheles maculatus</i>          | AF440198 |
| 17 Copepoda/Ostracoda            | <i>Lepeophtheirus salmonis</i>        | AF208263 | <i>Heterocypris sp.</i>             | L81944   |
| 18 Eucarida/Peracarida           | <i>Jasus edwardsii</i>                | AF235972 | <i>Sorthingyrella triplosinos a</i> | AY461482 |
| 19 Brachiopoda/Phoronifomea      | <i>Argyrotheca cordata</i>            | AF119078 | <i>Phoronis australis</i>           | AF119079 |
| 20 Acanthocephala/Rotifera       | <i>Polyacanthorhynchus caballeroi</i> | AF388660 | <i>Brachionus patulus</i>           | AF154568 |
| 21 Aplousobranchia/Caudofoveata  | <i>Helicoradomenia sp.</i>            | AY212108 | <i>Scutopus ventrolineatus</i>      | X91977   |
| 22 Bivalvia/Polyplacophora       | <i>Bathypecten vulcani</i>            | AY557608 | <i>Acanthochitona crinita</i>       | AF120503 |
| 23 Cephalopoda/Squid             | <i>Psychroteuthis sp.</i>             | AY557513 | <i>Rhabdus rectius</i>              | AF120523 |
| 24 Opisthobranchia/Pulmonata     | <i>Notaeolidia depressa</i>           | AY165770 | <i>Lymnaea viatrix</i>              | AY057088 |
| 25 Polychaeta/Oligochaeta        | <i>Proceraea comuta</i>               | AF212179 | <i>Sylaria sp.</i>                  | U95946   |
| 26 Petromyzontidae/Urochordata   | -                                     | -        | -                                   | -        |
| 27 Echinoidea/Asteroidea         | -                                     | -        | -                                   | -        |
| 28 Priapulida/Nematoda           | -                                     | -        | -                                   | -        |
| 29 Cestoda/Trematoda             | -                                     | -        | -                                   | -        |

[28S \(next\)](#)[Legend](#)

## (b) : 28S

| Pairs (Taxon 1/Taxon 2)          | Taxon 1                              |          | Taxon 2                              |          |
|----------------------------------|--------------------------------------|----------|--------------------------------------|----------|
|                                  | Species name                         | Acc. No. | Species name                         | Acc. No. |
| 1 Acoela/Orthonectida            | -                                    | -        | -                                    | -        |
| 2 Turbellaria/Trematoda          | <i>Childia groenlandica</i>          | AY157603 | <i>Lobatos toma manteri</i>          | AY157177 |
| 3 Cestoda/Monogenea              | <i>Railletina australis</i>          | AF286914 | <i>Gyrodactylus salaris</i>          | AJ542394 |
| 4 Urochordata/Cephalochordata    | <i>Ciona intestinalis</i>            | AF212177 | <i>Branchiosoma floridae</i>         | AF061796 |
| 5 Chondrichthyes/Petromyzontidae | <i>Rhinobatos productus</i>          | AY049851 | <i>Petromyzon marinus</i>            | AF061798 |
| 6 Serpentes/Lepidosauria         | -                                    | -        | -                                    | -        |
| 7 Echinozoa/Holothurozoa         | <i>Arbacia punctulata</i>            | AY026367 | <i>Psychropotes longicauda</i>       | Z80946   |
| 8 Asterozoa/Ophiurozoa           | <i>Porania pulvillus</i>             | Z80945   | <i>Ophiocanops fugiens</i>           | Z80943   |
| 9 Enteropneusta/Pterobranchia    | <i>Saccoglossus kowalevskii</i>      | AF212175 | <i>Cephalodiscus gracilis</i>        | AF212172 |
| 10 Priapulida/Kinorhyncha        | <i>Priapulid caudatus</i>            | AY210840 | <i>Pycnophyes greenlandicus</i>      | AY428828 |
| 11 Nematomorpha/Nematoda         | <i>Gordius aquaticus</i>             | AY210817 | <i>Labios trongylus bipapillosus</i> | AJ512837 |
| 12 Onychophora/Tardigrada        | <i>Peripatus sp.</i>                 | AY210836 | <i>Milnesium sp.</i>                 | AY210826 |
| 13 Araneae/Acari                 | <i>Misumenops asperatus</i>          | AY210461 | <i>Boophilus microplus</i>           | AF200189 |
| 14 Orthoptera/Hemiptera          | <i>Melanoplus sp.</i>                | AY125286 | <i>Euritea munda</i>                 | AF304633 |
| 15 Hymenoptera/Coleoptera        | <i>Ussurohelcon nigricomis</i>       | AJ302912 | <i>Toramus sp.</i>                   | AY310676 |
| 16 Lepidoptera/Diptera           | <i>Hemileuca sp.</i>                 | AF423922 | <i>Simulium sanctipauli</i>          | AF403820 |
| 17 Copepoda/Ostracoda            | <i>Cyclopidae sp.</i>                | AY210813 | <i>Cypridae sp.</i>                  | AY210815 |
| 18 Eucarida/Pterocarida          | <i>Aegla humahuaca</i>               | AY596086 | <i>Porcellio scaber</i>              | AY744901 |
| 19 Brachiopoda/Phoroniforae      | <i>Glottidia pyramidata</i>          | AY210459 | <i>Phoronis vancouverensis</i>       | AF342797 |
| 20 Acanthocephala/Rotifera       | <i>Oligacanthorhynchus tortuosus</i> | AY210466 | <i>Philodina roseola</i>             | AY210469 |
| 21 Aplousobranchia/Caudofoveata  | <i>Helicoradomenia sp.</i>           | AY145409 | <i>Chaetoderma sp.</i>               | AY145397 |
| 22 Bivalvia/Polyplacophora       | <i>Solemya velum</i>                 | AY145421 | <i>Chaetopleura apiculata</i>        | AY145398 |
| 23 Cephalopoda/Squid             | <i>Histioteuthis sp.</i>             | AY145410 | <i>Dentalium octangulatum</i>        | AY145403 |
| 24 Opisthobranchia/Pulmonata     | <i>Aplysia californica</i>           | AY026366 | <i>Deroceras reticulatum</i>         | AY145404 |
| 25 Polychaeta/Oligochaeta        | <i>Nereis succinea</i>               | AY210464 | <i>Eisenia fetida</i>                | AF212166 |
| 26 Petromyzontidae/Urochordata   | -                                    | -        | -                                    | -        |
| 27 Echinozoa/Asterozoa           | -                                    | -        | -                                    | -        |
| 28 Priapulida/Nematoda           | -                                    | -        | -                                    | -        |
| 29 Cestoda/Trematoda             | -                                    | -        | -                                    | -        |

[18S \(previous\)](#)[efl1a \(next\)](#)[Legend](#)

## (c) : ef1a

|    | Pairs (Taxon 1/Taxon 2)        | Taxon 1                              |          | Taxon 2                              |          |
|----|--------------------------------|--------------------------------------|----------|--------------------------------------|----------|
|    |                                | Species name                         | Acc. No. | Species name                         | Acc. No. |
| 1  | Acoela/Orthonectida            | -                                    | -        | -                                    | -        |
| 2  | Turbellaria/Trematoda          | <i>Mesostoma lingua</i>              | AF288069 | <i>Schistosoma japonicum</i>         | AF288067 |
| 3  | Cestoda/Monogenea              | <i>Grillotia erinaceus</i>           | AF288066 | <i>Neomicrocotyle pacifica</i>       | AF288070 |
| 4  | Urochordata/Cephalochordata    | -                                    | -        | -                                    | -        |
| 5  | Chondrichthyes/Petromyzontidae | -                                    | -        | -                                    | -        |
| 6  | Serpentes/Lepidosauria         | -                                    | -        | -                                    | -        |
| 7  | Echinoidea/Holothuroidea       | -                                    | -        | -                                    | -        |
| 8  | Asteroidea/Ophiuroidea         | -                                    | -        | -                                    | -        |
| 9  | Enteropneusta/Perobranchia     | -                                    | -        | -                                    | -        |
| 10 | Priapulida/Kinorhyncha         | -                                    | -        | -                                    | -        |
| 11 | Nematomorpha/Nematoda          | -                                    | -        | -                                    | -        |
| 12 | Onychophora/Tardigrada         | <i>Euperipatoides rowelli</i>        | AF137394 | <i>Milnesium tardigradum</i>         | AF063419 |
| 13 | Araneae/Acari                  | <i>Aphonopelma chalcodes</i>         | U90045   | <i>Calyptophthiracarus olivaceus</i> | AF240853 |
| 14 | Orthoptera/Hemiptera           | <i>Locusta migratoria</i>            | AY077627 | <i>Sictopelta sp.</i>                | AF182579 |
| 15 | Hymenoptera/Coleoptera         | <i>Leioproctus sp.</i>               | AY585141 | <i>Micracis carinulatus</i>          | AF186677 |
| 16 | Lepidoptera/Diptera            | <i>Statmia pyri</i>                  | DQ077816 | <i>Ectemnia sp.</i>                  | AF003589 |
| 17 | Copepoda/Ostracoda             | <i>Eurytemora affinis</i>            | AF063408 | <i>Cypridopsis vidua</i>             | AF063414 |
| 18 | Eucarida/Peracarida            | <i>Libinia emarginata</i>            | U90050   | <i>Heteromysis formosa</i>           | AF063410 |
| 19 | Brachiopoda/Phoroniforrea      | -                                    | -        | -                                    | -        |
| 20 | Acanthocephala/Rotifera        | -                                    | -        | -                                    | -        |
| 21 | Aplousobranchia/Caudofoveata   | -                                    | -        | -                                    | -        |
| 22 | Bivalvia/Polyplacophora        | <i>Mytilus galloprovincialis</i>     | AB162021 | <i>Chaetopleura apiculata</i>        | U90062   |
| 23 | Cephalopoda/Squid              | -                                    | -        | -                                    | -        |
| 24 | Opisthobranchia/Pulmonata      | -                                    | -        | -                                    | -        |
| 25 | Polychaeta/Oligochaeta         | <i>Chaetopterus sp.</i>              | AY580184 | <i>Enchytraeus sp.</i>               | AF063418 |
| 26 | Petromyzontidae/Urochordata    | <i>Oikopleura dioica</i>             | AF468038 | <i>Lethenteron japonicum</i>         | AB183717 |
| 27 | Echinoidea/Asteroidea          | <i>Strongylocentrotus purpuratus</i> | AY580285 | <i>Asterina miniata</i>              | AY580177 |
| 28 | Priapulida/Nematoda            | <i>Priapulid caudatus</i>            | AY580299 | <i>Onchocerca volvulus</i>           | M64333   |
| 29 | Cestoda/Trematoda              | -                                    | -        | -                                    | -        |

[28S \(previous\)](#)[COI \(next\)](#)[Legend](#)

## (d) : COI

| Pairs (Taxon 1/Taxon 2) |                                | Taxon 1                             |           | Taxon 2                           |           |
|-------------------------|--------------------------------|-------------------------------------|-----------|-----------------------------------|-----------|
|                         |                                | Species name                        | Acc. No.  | Species name                      | Acc. No.  |
| 1                       | Acoela/Orthonectida            | -                                   | -         | -                                 | -         |
| 2                       | Turbellaria/Trematoda          | <i>Pseudos tylochus intermedius</i> | AB049114  | <i>Paragonimus wes termani</i>    | NC_002354 |
| 3                       | Cestoda/Monogenea              | <i>Taenia asiatica</i>              | AF445798  | <i>Gyrodactylus salaris</i>       | AF479750  |
| 4                       | Urochordata/Cephalochordata    | <i>Doliolum nationalis</i>          | NC_006627 | <i>Epigonichthys lucayanus</i>    | AB110092  |
| 5                       | Chondrichthyes/Petromyzontidae | <i>Scyliorhinus canicula</i>        | NC_001950 | <i>Petromyzon marinus</i>         | NC_001626 |
| 6                       | Serpentes/Lepidosauria         | <i>Leptotyphlops dulcis</i>         | NC_005961 | <i>Teratoscincus keyserlingii</i> | NC_007008 |
| 7                       | Echinoidea/Holothuroidea       | <i>Arbacia lixula</i>               | NC_001770 | <i>Cucumaria miniata</i>          | NC_005929 |
| 8                       | As teroidea/Ophiuroidea        | <i>Pisaster ochraceus</i>           | NC_004610 | <i>Ophiura lutkeni</i>            | NC_005930 |
| 9                       | Enteropneusta/Pterobranchia    | -                                   | -         | -                                 | -         |
| 10                      | Priapulida/Kinorhyncha         | -                                   | -         | -                                 | -         |
| 11                      | Nematomorpha/Nematoda          | -                                   | -         | -                                 | -         |
| 12                      | Onychophora/Tardigrada         | -                                   | -         | -                                 | -         |
| 13                      | Araneae/Acari                  | <i>Heptathela hangzhouensis</i>     | NC_005924 | <i>Ixodes uriae</i>               | NC_006078 |
| 14                      | Orthoptera/Hemiptera           | <i>Locusta migratoria</i>           | NC_001712 | <i>Philaenus spumarius</i>        | NC_005944 |
| 15                      | Hymenoptera/Coleoptera         | <i>Melipona bicolor</i>             | NC_004529 | <i>Crioceris duodecimpunctata</i> | NC_003372 |
| 16                      | Lepidoptera/Diptera            | <i>Antheraea pemyi</i>              | NC_004622 | <i>Bactrocera oleae</i>           | NC_005333 |
| 17                      | Copepoda/Ostracoda             | <i>Tigriopus japonicus</i>          | NC_003979 | <i>Vargula hilgendorffii</i>      | NC_005306 |
| 18                      | Eucarida/Percarida             | <i>Marsupenaeus japonicus</i>       | NC_007010 | <i>Parhyale hawaiiensis</i>       | AY639937  |
| 19                      | Brachiopoda/Phoroniformea      | <i>Terebratalia transversa</i>      | NC_003086 | <i>Phoronis psammophila</i>       | AY368231  |
| 20                      | Acanthocephala/Rotifera        | <i>Leptorhynchoides thecatus</i>    | NC_006892 | <i>Synchaeta cf. pectinata</i>    | AF499093  |
| 21                      | Aplousobranchia/Caudofoveata   | <i>Helicoradomenia sp.</i>          | AY377725  | <i>Chaetoderma nitidulum</i>      | AY377726  |
| 22                      | Bivalvia/Polyplacophora        | <i>Mytilus galloprovincialis</i>    | NC_006886 | <i>Katharina tunicata</i>         | NC_001636 |
| 23                      | Cephalopoda/Squid              | <i>Todarodes pacificus</i>          | NC_006354 | <i>Graptacme eborea</i>           | NC_006162 |
| 24                      | Opisthobranchia/Pulmonata      | <i>Aplysia californica</i>          | NC_005827 | <i>Albinaria caerulea</i>         | NC_001761 |
| 25                      | Polychaeta/Oligochaeta         | <i>Clymenella torquata</i>          | NC_006321 | <i>Lumbricus terrestris</i>       | NC_001673 |
| 26                      | Petromyzontidae/Urochordata    | -                                   | -         | -                                 | -         |
| 27                      | Echinoidea/As teroidea         | -                                   | -         | -                                 | -         |
| 28                      | Priapulida/Nematoda            | -                                   | -         | -                                 | -         |
| 29                      | Cestoda/Trematoda              | -                                   | -         | -                                 | -         |

[efl1 \(previous\)](#)[COII \(next\)](#)[Legend](#)

## (e) : COII

| Pairs (Taxon 1/Taxon 2)          | Taxon 1                          |           | Taxon 2                           |           |
|----------------------------------|----------------------------------|-----------|-----------------------------------|-----------|
|                                  | Species name                     | Acc. No.  | Species name                      | Acc. No.  |
| 1 Acoela/Orthonectida            | -                                | -         | -                                 | -         |
| 2 Turbellaria/Trematoda          | -                                | -         | -                                 | -         |
| 3 Cestoda/Monogenea              | -                                | -         | -                                 | -         |
| 4 Urochordata/Cephalochordata    | <i>Doliolum nationalis</i>       | NC_006627 | <i>Epigonichthys lucayanus</i>    | AB110092  |
| 5 Chondrichthyes/Petromyzontidae | <i>Scyliorhinus canicula</i>     | NC_001950 | <i>Petromyzon marinus</i>         | NC_001626 |
| 6 Serpentes/Lepidosauria         | <i>Leptotyphlops dulcis</i>      | NC_005961 | <i>Teratoscincus keyserlingii</i> | NC_007008 |
| 7 Echinoidea/Holothuroidea       | <i>Arbacia lixula</i>            | NC_001770 | <i>Cucumaria miniata</i>          | NC_005929 |
| 8 As teroidea/Ophiuroidea        | <i>Pisaster ochraceus</i>        | NC_004610 | <i>Ophiura lutkeni</i>            | NC_005930 |
| 9 Enteropneusta/Pterobranchia    | -                                | -         | -                                 | -         |
| 10 Priapulida/Kinorhyncha        | -                                | -         | -                                 | -         |
| 11 Nematomorpha/Nematoda         | -                                | -         | -                                 | -         |
| 12 Onychophora/Tardigrada        | -                                | -         | -                                 | -         |
| 13 Araneae/Acari                 | <i>Heptathela hangzhouensis</i>  | NC_005924 | <i>Ixodes uriae</i>               | NC_006078 |
| 14 Orthoptera/Hemiptera          | <i>Locusta migratoria</i>        | NC_001712 | <i>Philaenus spumarius</i>        | NC_005944 |
| 15 Hymenoptera/Coleoptera        | <i>Melipona bicolor</i>          | NC_004529 | <i>Crioceris duodecimpunctata</i> | NC_003372 |
| 16 Lepidoptera/Diptera           | <i>Antheraea pernyi</i>          | NC_004622 | <i>Bactrocera oleae</i>           | NC_005333 |
| 17 Copepoda/Ostracoda            | <i>Tigriopus japonicus</i>       | NC_003979 | <i>Vargula hilgendorffii</i>      | NC_005306 |
| 18 Eucarida/Pteracarida          | <i>Marsupenaeus japonicus</i>    | NC_007010 | <i>Talitrus saltator</i>          | AY639937  |
| 19 Brachiopoda/Phoroniformea     | <i>Terebratalia transversa</i>   | NC_003086 | <i>Phoronis psammophila</i>       | AY368231  |
| 20 Acanthocephala/Rotifera       | -                                | -         | -                                 | -         |
| 21 Aplousobranchia/Caudofoveata  | -                                | -         | -                                 | -         |
| 22 Bivalvia/Polyplacophora       | <i>Mytilus galloprovincialis</i> | NC_006886 | <i>Katharina tunicata</i>         | NC_001636 |
| 23 Cephalopoda/Squid             | <i>Todarodes pacificus</i>       | NC_006354 | <i>Graptacme eborea</i>           | NC_006162 |
| 24 Opisthobranchia/Pulmonata     | <i>Aplysia californica</i>       | NC_005827 | <i>Albinaria caerulea</i>         | NC_001761 |
| 25 Polychaeta/Oligochaeta        | <i>Clymenella torquata</i>       | NC_006321 | <i>Lumbricus terrestris</i>       | NC_001673 |
| 26 Petromyzontidae/Urochordata   | -                                | -         | -                                 | -         |
| 27 Echinoidea/As teroidea        | -                                | -         | -                                 | -         |
| 28 Priapulida/Nematoda           | -                                | -         | -                                 | -         |
| 29 Cestoda/Trematoda             | <i>Taenia asiatica</i>           | AF445798  | <i>Paragonimus westermani</i>     | NC_002354 |

[COI \(previous\)](#)[COIII \(next\)](#)[Legend](#)

## (f) : COIII

| Pairs (Taxon 1/Taxon 2)          | Taxon 1                          |           | Taxon 2                           |           |
|----------------------------------|----------------------------------|-----------|-----------------------------------|-----------|
|                                  | Species name                     | Acc. No.  | Species name                      | Acc. No.  |
| 1 Acoela/Orthonectida            | -                                | -         | -                                 | -         |
| 2 Turbellaria/Trematoda          | -                                | -         | -                                 | -         |
| 3 Cestoda/Monogenea              | -                                | -         | -                                 | -         |
| 4 Urochordata/Cephalochordata    | <i>Doliolum nationalis</i>       | NC_006627 | <i>Epigonichthys lucayanus</i>    | AB110092  |
| 5 Chondrichthyes/Petromyzontidae | <i>Scyliorhinus canicula</i>     | NC_001950 | <i>Petromyzon marinus</i>         | NC_001626 |
| 6 Serpentes/Lepidosauria         | <i>Leptotyphlops dulcis</i>      | NC_005961 | <i>Teratoscincus keyserlingii</i> | NC_007008 |
| 7 Echinoidea/Holothuroidea       | <i>Arbacia lixula</i>            | NC_001770 | <i>Cucumaria miniata</i>          | NC_005929 |
| 8 Aseroidea/Ophiuroidea          | <i>Pisaster ochraceus</i>        | NC_004610 | <i>Ophiura lutkeni</i>            | NC_005930 |
| 9 Enteropneusta/Pterobranchia    | -                                | -         | -                                 | -         |
| 10 Priapulida/Kinorhyncha        | -                                | -         | -                                 | -         |
| 11 Nematomorpha/Nematoda         | -                                | -         | -                                 | -         |
| 12 Onychophora/Tardigrada        | -                                | -         | -                                 | -         |
| 13 Araneae/Acari                 | <i>Heptathela hangzhouensis</i>  | NC_005924 | <i>Ixodes uriae</i>               | NC_006078 |
| 14 Orthoptera/Hemiptera          | <i>Locusta migratoria</i>        | NC_001712 | <i>Philaenus spumarius</i>        | NC_005944 |
| 15 Hymenoptera/Coleoptera        | <i>Melipona bicolor</i>          | NC_004529 | <i>Crioceris duodecimpunctata</i> | NC_003372 |
| 16 Lepidoptera/Diptera           | <i>Antheraea pernyi</i>          | NC_004622 | <i>Bactrocera oleae</i>           | NC_005333 |
| 17 Copepoda/Ostracoda            | <i>Tigriopus japonicus</i>       | NC_003979 | <i>Vargula hilgendorffii</i>      | NC_005306 |
| 18 Eucarida/Perecarida           | <i>Marsupenaeus japonicus</i>    | NC_007010 | <i>Parhyale hawaiiensis</i>       | AY639937  |
| 19 Brachiopoda/Pteronidiformea   | <i>Terebratalia transversa</i>   | NC_003086 | <i>Phoronis psammophila</i>       | AY368231  |
| 20 Acanthocephala/Rotifera       | -                                | -         | -                                 | -         |
| 21 Aplousobranchia/Caudofoveata  | -                                | -         | -                                 | -         |
| 22 Bivalvia/Polyplacophora       | <i>Mytilus galloprovincialis</i> | NC_006886 | <i>Katharina tunicata</i>         | NC_001636 |
| 23 Cephalopoda/Squid             | <i>Todarodes pacificus</i>       | NC_006354 | <i>Graptacme eborea</i>           | NC_006162 |
| 24 Opisthobranchia/Pulmonata     | <i>Aplysia californica</i>       | NC_005827 | <i>Albinaria caerulea</i>         | NC_001761 |
| 25 Polychaeta/Oligochaeta        | <i>Clymenella torquata</i>       | NC_006321 | <i>Lumbricus terrestris</i>       | NC_001673 |
| 26 Petromyzontidae/Urochordata   | -                                | -         | -                                 | -         |
| 27 Echinoidea/Aseroidea          | -                                | -         | -                                 | -         |
| 28 Priapulida/Nematoda           | -                                | -         | -                                 | -         |
| 29 Cestoda/Trematoda             | <i>Taenia asiatica</i>           | AF445798  | <i>Paragonimus westermani</i>     | NC_002354 |

[COII \(previous\)](#)[cytB \(next\)](#)[Legend](#)

## (g) : cytB

|    | Pairs (Taxon 1/Taxon 2)        | Taxon 1                          |           | Taxon 2                           |           |
|----|--------------------------------|----------------------------------|-----------|-----------------------------------|-----------|
|    |                                | Species name                     | Acc. No.  | Species name                      | Acc. No.  |
| 1  | Acoela/Orthonectida            | -                                | -         | -                                 | -         |
| 2  | Turbellaria/Trematoda          | -                                | -         | -                                 | -         |
| 3  | Cestoda/Monogenea              | -                                | -         | -                                 | -         |
| 4  | Urochordata/Cephalochordata    | <i>Doliolum nationalis</i>       | NC_006627 | <i>Epigonichthys lucayanus</i>    | AB110092  |
| 5  | Chondrichthyes/Petromyzontidae | <i>Scyliorhinus canicula</i>     | NC_001950 | <i>Petromyzon marinus</i>         | NC_001626 |
| 6  | Serpentes/Lepidosauria         | <i>Leptotyphlops dulcis</i>      | NC_005961 | <i>Teratoscincus keyserlingii</i> | NC_007008 |
| 7  | Echinoidea/Holothuroidea       | <i>Arbacia lixula</i>            | NC_001770 | <i>Cucumaria miniata</i>          | NC_005929 |
| 8  | As teroidea/Ophiuroidea        | <i>Pisaster ochraceus</i>        | NC_004610 | <i>Ophiura lutkeni</i>            | NC_005930 |
| 9  | Enteropneusta/Perobranchia     | -                                | -         | -                                 | -         |
| 10 | Priapulida/Kinorhyncha         | -                                | -         | -                                 | -         |
| 11 | Nematomorpha/Nematoda          | -                                | -         | -                                 | -         |
| 12 | Onychophora/Tardigrada         | -                                | -         | -                                 | -         |
| 13 | Araneae/Acari                  | <i>Heptathela hangzhouensis</i>  | NC_005924 | <i>Ixodes uriae</i>               | NC_006078 |
| 14 | Orthoptera/Hemiptera           | <i>Locusta migratoria</i>        | NC_001712 | <i>Philaenus spumarius</i>        | NC_005944 |
| 15 | Hymenoptera/Coleoptera         | <i>Melipona bicolor</i>          | NC_004529 | <i>Crioceris duodecimpunctata</i> | NC_003372 |
| 16 | Lepidoptera/Diptera            | <i>Antheraea pernyi</i>          | NC_004622 | <i>Bactrocera oleae</i>           | NC_005333 |
| 17 | Copepoda/Ostracoda             | <i>Tigriopus japonicus</i>       | NC_003979 | <i>Vargula hilgendorffii</i>      | NC_005306 |
| 18 | Eucarida/Peracarida            | <i>Marsupenaeus japonicus</i>    | NC_007010 | <i>Parhyale hawaiiensis</i>       | AY639937  |
| 19 | Brachiopoda/Phoroniformea      | <i>Terebratalia transversa</i>   | NC_003086 | <i>Phoronis psammophila</i>       | AY368231  |
| 20 | Acanthocephala/Rotifera        | -                                | -         | -                                 | -         |
| 21 | Aplacophora/Caudofoveata       | -                                | -         | -                                 | -         |
| 22 | Bivalvia/Polyplacophora        | <i>Mytilus galloprovincialis</i> | NC_006886 | <i>Katharina tunicata</i>         | NC_001636 |
| 23 | Cephalopoda/Squid              | <i>Todarodes pacificus</i>       | NC_006354 | <i>Graptacme eborea</i>           | NC_006162 |
| 24 | Opisthobranchia/Pulmonata      | <i>Aplysia californica</i>       | NC_005827 | <i>Albinaria caerulea</i>         | NC_001761 |
| 25 | Polychaeta/Oligochaeta         | <i>Clymenella torquata</i>       | NC_006321 | <i>Lumbricus terrestris</i>       | NC_001673 |
| 26 | Petromyzontidae/Urochordata    | -                                | -         | -                                 | -         |
| 27 | Echinoidea/As teroidea         | -                                | -         | -                                 | -         |
| 28 | Priapulida/Nematoda            | -                                | -         | -                                 | -         |
| 29 | Cestoda/Trematoda              | -                                | -         | -                                 | -         |

[COIII \(previous\)](#)[NADH1 \(previous\)](#)[Legend](#)



**(h) : NADH1**

| Pairs (Taxon 1/Taxon 2)          | Taxon 1                          |           | Taxon 2                           |           |
|----------------------------------|----------------------------------|-----------|-----------------------------------|-----------|
|                                  | Species name                     | Acc. No.  | Species name                      | Acc. No.  |
| 1 Acoela/Orthonectida            | -                                | -         | -                                 | -         |
| 2 Turbellaria/Trematoda          | -                                | -         | -                                 | -         |
| 3 Cestoda/Monogenea              | -                                | -         | -                                 | -         |
| 4 Urochordata/Cephalochordata    | <i>Doliolum nationalis</i>       | NC_006627 | <i>Epigonichthys lucayanus</i>    | AB110092  |
| 5 Chondrichthyes/Petromyzontidae | <i>Scyllorhinus canicula</i>     | NC_001950 | <i>Petromyzon marinus</i>         | NC_001626 |
| 6 Serpentes/Lepidosauria         | <i>Leptotyphlops dulcis</i>      | NC_005961 | <i>Teratoscincus keyserlingii</i> | NC_007008 |
| 7 Echinozoa/Holothurozoa         | <i>Arbacia lixula</i>            | NC_001770 | <i>Cucumaria miniata</i>          | NC_005929 |
| 8 As teroidea/Ophiurozoa         | <i>Pisaster ochraceus</i>        | NC_004610 | <i>Ophiura lutkeni</i>            | NC_005930 |
| 9 Enteropneusta/Pterobranchia    | -                                | -         | -                                 | -         |
| 10 Priapulida/Kinorhyncha        | -                                | -         | -                                 | -         |
| 11 Nematomorpha/Nematoda         | -                                | -         | -                                 | -         |
| 12 Onychophora/Tardigrada        | -                                | -         | -                                 | -         |
| 13 Araneae/Acari                 | <i>Heptathela hangzhouensis</i>  | NC_005924 | <i>Ixodes uriae</i>               | NC_006078 |
| 14 Orthoptera/Hemiptera          | <i>Locusta migratoria</i>        | NC_001712 | <i>Philaenus spumarius</i>        | NC_005944 |
| 15 Hymenoptera/Coleoptera        | <i>Melipona bicolor</i>          | NC_004529 | <i>Crioceris duodecimpunctata</i> | NC_003372 |
| 16 Lepidoptera/Diptera           | <i>Antheraea pernyi</i>          | NC_004622 | <i>Bactrocera oleae</i>           | NC_005333 |
| 17 Copepoda/Ostracoda            | <i>Tigriopus japonicus</i>       | NC_003979 | <i>Vargula hilgendorffii</i>      | NC_005306 |
| 18 Eucarida/Percarida            | <i>Marsupenaeus japonicus</i>    | NC_007010 | <i>Parhyale hawaiiensis</i>       | AY639937  |
| 19 Brachiopoda/Phoroniforae      | <i>Terebratalia transversa</i>   | NC_003086 | <i>Phoronis psammophila</i>       | AY368231  |
| 20 Acanthocephala/Rotifera       | -                                | -         | -                                 | -         |
| 21 Aplousobranchia/Caudofoveata  | -                                | -         | -                                 | -         |
| 22 Bivalvia/Polyplacophora       | <i>Mytilus galloprovincialis</i> | NC_006886 | <i>Katharina tunicata</i>         | NC_001636 |
| 23 Cephalopoda/Squid             | <i>Todarodes pacificus</i>       | NC_006354 | <i>Graptacme eborea</i>           | NC_006162 |
| 24 Opisthobranchia/Pulmonata     | <i>Aplysia californica</i>       | NC_005827 | <i>Albinaria caerulea</i>         | NC_001761 |
| 25 Polychaeta/Oligochaeta        | <i>Clymenella torquata</i>       | NC_006321 | <i>Lumbricus terrestris</i>       | NC_001673 |
| 26 Petromyzontidae/Urochordata   | -                                | -         | -                                 | -         |
| 27 Echinozoa/As teroidea         | -                                | -         | -                                 | -         |
| 28 Priapulida/Nematoda           | -                                | -         | -                                 | -         |
| 29 Cestoda/Trematoda             | <i>Taenia asiatica</i>           | AF445798  | <i>Paragonimus westermani</i>     | NC_002354 |

[cytB \(previous\)](#)[NADH4 \(next\)](#)[Legend](#)

## (i) : NADH4

| Pairs (Taxon 1/Taxon 2)          | Taxon 1                          |           | Taxon 2                           |           |
|----------------------------------|----------------------------------|-----------|-----------------------------------|-----------|
|                                  | Species name                     | Acc. No.  | Species name                      | Acc. No.  |
| 1 Acoela/Orthonectida            | -                                | -         | -                                 | -         |
| 2 Turbellaria/Trematoda          | -                                | -         | -                                 | -         |
| 3 Cestoda/Monogenea              | -                                | -         | -                                 | -         |
| 4 Urochordata/Cephalochordata    | <i>Doliolum nationalis</i>       | NC_006627 | <i>Epigonichthys lucayanus</i>    | AB110092  |
| 5 Chondrichthyes/Petromyzontidae | <i>Scyliorhinus canicula</i>     | NC_001950 | <i>Petromyzon marinus</i>         | NC_001626 |
| 6 Serpentes/Lepidosauria         | <i>Leptotyphlops dulcis</i>      | NC_005961 | <i>Teratoscincus keyserlingii</i> | NC_007008 |
| 7 Echinozoa/Holothurozoa         | <i>Arbacia lixula</i>            | NC_001770 | <i>Cucumaria miniata</i>          | NC_005929 |
| 8 Ascomycota/Ophiurozoa          | <i>Pisaster ochraceus</i>        | NC_004610 | <i>Ophiura luteni</i>             | NC_005930 |
| 9 Enteropneusta/Phlebobranchia   | -                                | -         | -                                 | -         |
| 10 Platyhelminthes/Kinorhyncha   | -                                | -         | -                                 | -         |
| 11 Nematoda/Nematoda             | -                                | -         | -                                 | -         |
| 12 Onychophora/Tardigrada        | -                                | -         | -                                 | -         |
| 13 Araneae/Acari                 | <i>Heptathela hangzhouensis</i>  | NC_005924 | <i>Ixodes uriae</i>               | NC_006078 |
| 14 Orthoptera/Hemiptera          | <i>Locusta migratoria</i>        | NC_001712 | <i>Philaenus spumarius</i>        | NC_005944 |
| 15 Hymenoptera/Coleoptera        | <i>Melipona bicolor</i>          | NC_004529 | <i>Crioceris duodecimpunctata</i> | NC_003372 |
| 16 Lepidoptera/Diptera           | <i>Antheraea pernyi</i>          | NC_004622 | <i>Bactrocera oleae</i>           | NC_005333 |
| 17 Copepoda/Ostracoda            | <i>Tigriopus japonicus</i>       | NC_003979 | <i>Vargula hilgendorffii</i>      | NC_005306 |
| 18 Eucarida/Peracarida           | <i>Marsupenaeus japonicus</i>    | NC_007010 | <i>Parhyale hawaiiensis</i>       | AY639937  |
| 19 Brachiopoda/Phoroniforae      | <i>Terebratalia transversa</i>   | NC_003086 | <i>Phoronis psammophila</i>       | AY368231  |
| 20 Acanthocephala/Rotifera       | -                                | -         | -                                 | -         |
| 21 Aplousobranchia/Caudofoveata  | -                                | -         | -                                 | -         |
| 22 Bivalvia/Polyplacophora       | <i>Mytilus galloprovincialis</i> | NC_006886 | <i>Katharina tunicata</i>         | NC_001636 |
| 23 Cephalopoda/Squid             | <i>Todarodes pacificus</i>       | NC_006354 | <i>Graptacme eborea</i>           | NC_006162 |
| 24 Opisthobranchia/Pulmonata     | <i>Aplysia californica</i>       | NC_005827 | <i>Albinaria caerulea</i>         | NC_001761 |
| 25 Polychaeta/Oligochaeta        | <i>Clymenella torquata</i>       | NC_006321 | <i>Lumbricus terrestris</i>       | NC_001673 |
| 26 Petromyzontidae/Urochordata   | -                                | -         | -                                 | -         |
| 27 Echinozoa/Ascomycota          | -                                | -         | -                                 | -         |
| 28 Platyhelminthes/Nematoda      | -                                | -         | -                                 | -         |
| 29 Cestoda/Trematoda             | <i>Taenia asiatica</i>           | AF445798  | <i>Paragonimus westermani</i>     | NC_002354 |

[NADH1 \(previous\)](#)[Legend](#)
