# Supplementary material for: The influence of body size and net diversification rate on molecular evolution during the radiation of animal phyla
Source: PubMed Central journal article supplement (PMC1929056; doi:10.1186/1471-2148-7-95), 2007-06-26
Supplement: 1471-2148-7-95-S8.pdf [file 1471-2148-7-95-S8.pdf]

|              | <b>Alignment length<br/>BEFORE removing un-<br/>alignable part</b> | <b>Alignment length AFTER<br/>removing un-alignable<br/>part</b> | <b>% removed</b> |
|--------------|--------------------------------------------------------------------|------------------------------------------------------------------|------------------|
| <b>18S</b>   | 2567                                                               | 1313                                                             | 48.9             |
| <b>28S</b>   | 5913                                                               | 1403                                                             | 76.3             |
| <b>ef1a</b>  | 2358                                                               | 1088                                                             | 53.9             |
| <b>COI</b>   | 1711                                                               | 824                                                              | 51.8             |
| <b>COII</b>  | 769                                                                | 611                                                              | 20.5             |
| <b>COIII</b> | 952                                                                | 371                                                              | 61.0             |
| <b>cytB</b>  | 1243                                                               | 635                                                              | 48.9             |
| <b>NADH1</b> | 1034                                                               | 314                                                              | 69.6             |
| <b>NADH4</b> | 1469                                                               | 413                                                              | 71.9             |

**mean=55.87**
