# Supplementary material for: The influence of body size and net diversification rate on molecular evolution during the radiation of animal phyla
Source: PubMed Central journal article supplement (PMC1929056; doi:10.1186/1471-2148-7-95), 2007-06-26
Supplement: 1471-2148-7-95-S9.pdf [file 1471-2148-7-95-S9.pdf]

|                                        | Nuclear genes                  |      |      | Mitochondrial genes |      |       |      |       |       | Concatenations |      |
|----------------------------------------|--------------------------------|------|------|---------------------|------|-------|------|-------|-------|----------------|------|
|                                        | 18S                            | 28S  | ef1a | COI                 | COII | COIII | cytb | NADH1 | NADH4 | C 100          | C 20 |
| <b>Number of comparison pairs used</b> | 25                             | 23   | 14   | 20                  | 17   | 17    | 16   | 17    | 17    | 20             | 16   |
| <b>Alignment length</b>                | 1311                           | 1399 | 1086 | 822                 | 609  | 369   | 633  | 312   | 411   | 3156           | 3156 |
| <b>Comparison pairs used :</b>         |                                |      |      |                     |      |       |      |       |       |                |      |
| 1                                      | Acoela/Orthonectida            | x    |      |                     |      |       |      |       |       |                |      |
| 2                                      | Turbellaria/Trematoda          | x    | x    | x                   | x    |       |      |       |       | x              |      |
| 3                                      | Cestoda/Monogenea              | x    | x    | x                   | x    |       |      |       |       | x              |      |
| 4                                      | Urochordata/Cephalochordata    | x    | x    |                     | x    | x     | x    | x     | x     | x              | x    |
| 5                                      | Chondrichthyes/Petromyzontidae | x    | x    |                     | x    | x     | x    | x     | x     | x              | x    |
| 6                                      | Serpentes/Lepidosauria         | x    |      |                     | x    | x     | x    | x     | x     | x              | x    |
| 7                                      | Echinoidea/Holothuroidea       | x    | x    |                     | x    | x     | x    | x     | x     | x              | x    |
| 8                                      | Asterozoa/Ophiurozoa           | x    | x    |                     | x    | x     | x    | x     | x     | x              | x    |
| 9                                      | Enteropneusta/Pterobranchia    | x    | x    |                     |      |       |      |       |       |                |      |
| 10                                     | Priapulida/Kinorhyncha         | x    | x    |                     |      |       |      |       |       |                |      |
| 11                                     | Nematomorpha/Nematoda          | x    | x    |                     |      |       |      |       |       |                |      |
| 12                                     | Onychophora/Tardigrada         | x    | x    | x                   |      |       |      |       |       |                |      |
| 13                                     | Araneae/Acari                  | x    | x    | x                   | x    | x     | x    | x     | x     | x              | x    |
| 14                                     | Orthoptera/Hemiptera           | x    | x    | x                   | x    | x     | x    | x     | x     | x              | x    |
| 15                                     | Hymenoptera/Coleoptera         | x    | x    | x                   | x    | x     | x    | x     | x     | x              | x    |
| 16                                     | Lepidoptera/Diptera            | x    | x    | x                   | x    | x     | x    | x     | x     | x              | x    |
| 17                                     | Copepoda/Ostracoda             | x    | x    | x                   | x    | x     | x    | x     | x     | x              | x    |
| 18                                     | Eucarida/Peracarida            | x    | x    | x                   | x    | x     | x    | x     | x     | x              | x    |
| 19                                     | Brachiopoda/Phoroniforae       | x    | x    |                     | x    | x     | x    | x     | x     | x              | x    |
| 20                                     | Acanthocephala/Rotifera        | x    | x    |                     | x    |       |      |       |       | x              |      |
| 21                                     | Aplousobranchia/Caudofoveata   | x    | x    |                     | x    |       |      |       |       | x              |      |
| 22                                     | Bivalvia/Polyplacophora        | x    | x    | x                   | x    | x     | x    | x     | x     | x              | x    |
| 23                                     | Cephalopoda/Squid              | x    | x    |                     | x    | x     | x    | x     | x     | x              | x    |
| 24                                     | Opisthobranchia/Pulmonata      | x    | x    |                     | x    | x     | x    | x     | x     | x              | x    |
| 25                                     | Polychaeta/Oligochaeta         | x    | x    | x                   | x    | x     | x    | x     | x     | x              | x    |
| 26                                     | Petromyzontidae/Urochordata    |      |      | x                   |      |       |      |       |       |                |      |
| 27                                     | Echinozoa/Asterozoa            |      |      | x                   |      |       |      |       |       |                |      |
| 28                                     | Priapulida/Nematoda            |      |      | x                   |      |       |      |       |       |                |      |
| 29                                     | Cestoda/Trematoda              |      |      |                     | x    | x     |      | x     | x     |                |      |
